# Supplementary material for: Characterization of Oligometastatic Disease in a Real-World Nationwide Cohort of 3447 Patients With de Novo Metastatic Breast Cancer
Source: PubMed Central journal article supplement (PMC8099998; doi:10.1093/jncics/pkab010), 2021-02-04
Supplement: pkab010_supplementary_data.pdf [file pkab010_supplementary_data.pdf]

## SUPPLEMENTARY MATERIAL

Characterization of oligometastatic disease in a real-world nationwide cohort of 3,447 patients with de novo metastatic breast cancer

Tessa G Steenbruggen, Michael Schaapveld, Hugo M Horlings et al.

## Supplementary Table 1. Comparison baseline and treatment characteristics between patients

with 1 vs 2-3 vs 4-5 vs >5 metastases in the weighted cohort <sup>a</sup>

|                                       | patients with 1<br>metastasis<br>(n = 269)<br>No. (%) | patients with 2-3<br>metastases<br>(n = 248)<br>No. (%) | patients with 4-5<br>metastases<br>(n = 95)<br>No. (%) | Patients with >5<br>metastases<br>(n = 2,528)<br>No. (%) | P value <sup>b</sup> |
|---------------------------------------|-------------------------------------------------------|---------------------------------------------------------|--------------------------------------------------------|----------------------------------------------------------|----------------------|
| Age at diagnosis of MBC               |                                                       |                                                         |                                                        |                                                          | 0.18                 |
| 20-39                                 | 17 (6.3%)                                             | 18 (7.2%)                                               | 3 (3.2%)                                               | 148 (5.8%)                                               |                      |
| 40-59                                 | 129 (48.0%)                                           | 169 (68.1%)                                             | 35 (36.8%)                                             | 1,190 (47.1%)                                            |                      |
| 60-79                                 | 123 (45.7%)                                           | 61 (24.7%)                                              | 57 (60.0%)                                             | 1,190 (47.1%)                                            |                      |
| Menopausal status                     |                                                       |                                                         |                                                        |                                                          | 0.61                 |
| premenopausal                         | 49 (18.2%)                                            | 72 (29.0%)                                              | 21 (22.1%)                                             | 461 (18.2%)                                              |                      |
| perimenopausal                        | 45 (16.7%)                                            | 37 (14.9%)                                              | 8 (8.4%)                                               | 498 (19.7%)                                              |                      |
| postmenopausal                        | 175 (65.1%)                                           | 139 (56.5%)                                             | 66 (69.5%)                                             | 1,569 (62.1%)                                            |                      |
| Comorbidities                         |                                                       |                                                         |                                                        |                                                          | 0.38                 |
| no comorbidity                        | 135 (50.2%)                                           | 153 (61.7%)                                             | 38 (40.0%)                                             | 1,229 (48.6%)                                            |                      |
| single                                | 53 (19.7%)                                            | 45 (18.2%)                                              | 21 (22.1%)                                             | 632 (25.0%)                                              |                      |
| multiple                              | 65 (24.2%)                                            | 15 (6.0%)                                               | 11 (11.6%)                                             | 348 (13.8%)                                              |                      |
| unknown                               | 16 (5.9%)                                             | 35 (14.1%)                                              | 25 (26.3%)                                             | 319 (12.6%)                                              |                      |
| Subtype                               |                                                       |                                                         |                                                        |                                                          | 0.51 <sup>c</sup>    |
| ER+, HER2-/unknown                    | 176 (65.4%)                                           | 139 (56.0%)                                             | 54 (56.8%)                                             | 1,753 (69.3%)                                            |                      |
| HER2+, ER+                            | 28 (10.4%)                                            | 36 (14.5%)                                              | 16 (16.8%)                                             | 254 (10.1%)                                              |                      |
| HER2+, ER-                            | 37 (13.8%)                                            | 28 (11.3%)                                              | 25 (26.3%)                                             | 166 (6.6%)                                               |                      |
| triple negative                       | 18 (6.7%)                                             | 17 (6.9%)                                               | 0 (0%)                                                 | 115 (4.5%)                                               |                      |
| unknown                               | 10 (3.7%)                                             | 28 (11.3%)                                              | 0 (0%)                                                 | 240 (9.5%)                                               |                      |
| Single-organ metastases               |                                                       |                                                         |                                                        |                                                          | <0.001 <sup>c</sup>  |
| yes                                   | 269 (100%)                                            | 158 (63.7%)                                             | 57 (60.0%)                                             | 1,149 (45.6%)                                            |                      |
| no                                    | 0 (0%)                                                | 90 (36.3%)                                              | 38 (40.0%)                                             | 1,370 (54.4%)                                            |                      |
| <i>Location of metastases</i>         |                                                       |                                                         |                                                        |                                                          |                      |
| Lymph nodes                           | 22 (8.2%)                                             | 17 (6.9%)                                               | 6 (6.3%)                                               | 370 (14.6%)                                              | 0.30                 |
| Bone                                  | 106 (39.4%)                                           | 183 (73.8%)                                             | 66 (69.5%)                                             | 2,008 (79.4%)                                            | <0.001               |
| Liver                                 | 92 (34.2%)                                            | 84 (33.9%)                                              | 38 (40.0%)                                             | 885 (35.0%)                                              | 0.98                 |
| Lung                                  | 4 (1.5%)                                              | 50 (20.2%)                                              | 20 (21.1%)                                             | 637 (25.2%)                                              | 0.006                |
| Skin                                  | 14 (5.2%)                                             | 0 (0%)                                                  | 0 (0%)                                                 | 78 (3.1%)                                                | 0.52 <sup>c</sup>    |
| CNS                                   | 13 (4.8%)                                             | 16 (6.5%)                                               | 0 (0%)                                                 | 123 (4.9%)                                               | 0.84 <sup>c</sup>    |
| <i>Therapy</i>                        |                                                       |                                                         |                                                        |                                                          |                      |
| First-line systemic therapy           |                                                       |                                                         |                                                        |                                                          | 0.08 <sup>c</sup>    |
| endocrine therapy                     | 111 (41.2%)                                           | 98 (39.5%)                                              | 44 (46.3%)                                             | 1,391 (55.0%)                                            |                      |
| taxane-based therapy                  | 30 (11.1%)                                            | 22 (8.9%)                                               | 0 (0%)                                                 | 129 (5.1%)                                               |                      |
| taxane+anthracycline<br>based therapy | 12 (4.5%)                                             | 13 (5.2%)                                               | 16 (16.8%)                                             | 64 (2.5%)                                                |                      |
| anthracycline-based<br>therapy        | 72 (26.8%)                                            | 94 (37.9%)                                              | 30 (31.6%)                                             | 624 (24.7%)                                              |                      |
| other systemic therapy                | 11 (4.1%)                                             | 21 (8.5%)                                               | 5 (5.3%)                                               | 217 (8.6%)                                               |                      |
| no systemic therapy                   | 33 (12.3%)                                            | 0 (0%)                                                  | 0 (0%)                                                 | 103 (4.1%)                                               |                      |

|                                                                |     |         |     |         |    |         |       |         |
|----------------------------------------------------------------|-----|---------|-----|---------|----|---------|-------|---------|
| Local therapy primary tumor <sup>d</sup>                       |     |         |     |         |    |         |       | 0.10    |
| local therapy                                                  | 145 | (54.0%) | 70  | (28.2%) | 29 | (30.5%) | 863   | (34.1%) |
| no local therapy                                               | 124 | (46.0%) | 178 | (71.8%) | 66 | (69.5%) | 1,665 | (65.9%) |
| Local therapy metastases <sup>e</sup>                          |     |         |     |         |    |         |       | 0.21    |
| local therapy                                                  | 70  | (26.0%) | 57  | (23.0%) | 10 | (10.5%) | 766   | (30.3%) |
| no local therapy                                               | 199 | (74.0%) | 191 | (77.0%) | 85 | (89.5%) | 1,762 | (69.7%) |
| Combination of treatments                                      |     |         |     |         |    |         |       | <0.001  |
| Local therapy all metastases and primary and systemic therapy  | 12  | (4.4%)  | 1   | (0.4%)  | 0  | (0%)    | 0     | (0%)    |
| Local therapy some metastases and primary and systemic therapy | 27  | (10.0%) | 15  | (6.0%)  | 0  | (0%)    | 213   | (8.5%)  |
| Local therapy all metastases and systemic therapy              | 1   | (0.4%)  | 6   | (2.4%)  | 0  | (0%)    | 0     | (0%)    |
| Local therapy some metastases and systemic therapy             | 28  | (10.4%) | 35  | (14.1%) | 9  | (9.5%)  | 537   | (21.5%) |
| Local therapy primary and systemic therapy                     | 75  | (27.9%) | 48  | (19.4%) | 28 | (29.5%) | 452   | (18.1%) |
| Systemic therapy only                                          | 93  | (34.6%) | 143 | (57.7%) | 58 | (61.0%) | 1,222 | (48.9%) |
| Local therapy primary                                          | 7   | (2.6%)  | 0   | (0%)    | 0  | (0%)    | 7     | (0.3%)  |
| Local therapy all metastases                                   | 1   | (0.4%)  | 0   | (0%)    | 0  | (0%)    | 0     | (0%)    |
| No therapy                                                     | 25  | (9.3%)  | 0   | (0%)    | 0  | (0%)    | 70    | (2.8%)  |

Abbreviations: ER, estrogen receptor; CNS, central nervous system; HER2, human epithelial growth factor receptor 2; MBC, metastatic breast cancer.

<sup>a</sup> Numbers and percentages are based on weighted cohort; the number of metastases was available for 3,140 out of 3,447 MBC patients. Percentages are based on known values unless unknown values are mentioned.

<sup>b</sup> P values are based on likelihood ratio test, unless stated otherwise.

<sup>c</sup> P value based on Pearson's Chi-squared test.

<sup>d</sup> Local therapy of metastases was either stereotactic body radiotherapy (26%), thermal ablation (<1%), surgery (1%) or both (1%).

<sup>e</sup> Local therapy of the primary tumor was either surgery (23%), radiotherapy (7%) or a combination (8%).

**Supplementary Table 2. Multivariable model associations with OS in the weighted cohort consisting of all patients with de novo MBC**

| Characteristic                            | Hazard ratio (95% CI) | P value |
|-------------------------------------------|-----------------------|---------|
| Age (cont.)                               | 1.01 (0.99 to 1.02)   | 0.35    |
| Menopausal status                         |                       |         |
| premenopausal                             | 0.70 (0.51 to 0.99)   | 0.04    |
| perimenopausal                            | 0.95 (0.70 to 1.28)   | 0.69    |
| postmenopausal                            | reference             |         |
| Breast cancer subtype                     |                       |         |
| ER+, HER2-/unknown                        | reference             |         |
| HER2+, ER+                                | 1.07 (0.83 to 1.37)   | 0.61    |
| HER2+, ER-                                | 1.23 (0.87 to 1.70)   | 0.22    |
| triple-negative                           | 2.01 (1.23 to 3.03)   | 0.002   |
| unknown                                   | 1.92 (1.28 to 3.02)   | 0.004   |
| Oligometastases ( $\leq 3$ metastases)    |                       |         |
| yes                                       | 0.67 (0.52 to 0.87)   | 0.002   |
| no                                        | reference             |         |
| Single-organ metastases                   |                       |         |
| yes                                       | 0.85 (0.66 to 1.05)   | 0.23    |
| no                                        | reference             |         |
| Bone metastases                           |                       |         |
| yes                                       | 0.97 (0.73 to 1.29)   | 0.85    |
| no                                        | reference             |         |
| Lung metastases                           |                       |         |
| yes                                       | 1.26 (0.96 to 1.65)   | 0.10    |
| no                                        | reference             |         |
| Liver metastases                          |                       |         |
| yes                                       | 1.44 (1.11 to 1.88)   | 0.006   |
| no                                        | reference             |         |
| CNS metastases                            |                       |         |
| yes                                       | 1.57 (1.01 to 2.44)   | 0.045   |
| no                                        | reference             |         |
| First-line systemic therapy               |                       |         |
| ET                                        | reference             |         |
| taxane-based therapy +/- ET               | 0.86 (0.61 to 1.22)   | 0.39    |
| taxane+anthracycline-based therapy +/- ET | 0.96 (0.56 to 1.66)   | 0.89    |
| anthracycline-based therapy +/- ET        | 1.12 (0.87 to 1.44)   | 0.38    |
| other therapy +/- ET                      | 1.34 (0.96 to 1.89)   | 0.089   |
| no systemic therapy                       | 5.34 (2.86 to 9.95)   | <0.001  |
| Local therapy primary tumor <sup>b</sup>  |                       |         |
| yes                                       | 0.82 (0.68 to 0.98)   | 0.03    |
| no                                        | reference             |         |
| Local therapy metastases <sup>c</sup>     |                       |         |
| yes                                       | 1.03 (0.85 to 1.25)   | 0.78    |
| no                                        | reference             |         |

Abbreviations: CI, confidence interval; CNS, central nervous system; ER, estrogen receptor; ET, endocrine therapy; HER2, human epithelial growth factor receptor 2, MBC; metastatic breast cancer.

<sup>a</sup> 95% confidence interval is based on robust standard errors.

<sup>b</sup> Local therapy of the primary tumor was either surgery, radiotherapy or a combination. See Table S1 for details.

<sup>c</sup> Local therapy of metastases was either stereotactic body radiotherapy, radiofrequency ablation or surgery.

**Supplementary Table 3. Multivariable model of associations with PFS in weighted cohort of patients with de novo OMBC ( $\leq 3$  metastases)**

| Characteristic                              | Adjusted hazard ratio (95% CI) <sup>a</sup> | P value |
|---------------------------------------------|---------------------------------------------|---------|
| Age (cont.)                                 | 0.98 (0.95 to 1.02)                         | 0.30    |
| Menopausal status                           |                                             |         |
| premenopausal                               | 0.28 (0.14 to 0.57)                         | <0.001  |
| perimenopausal                              | 0.45 (0.24 to 0.83)                         | 0.01    |
| postmenopausal                              | reference                                   |         |
| Breast cancer subtype                       |                                             |         |
| ER+, HER2-/unknown                          | reference                                   |         |
| HER2+, ER+                                  | 1.97 (0.99 to 3.92)                         | 0.05    |
| HER2+, ER-                                  | 1.89 (1.04 to 3.43)                         | 0.04    |
| triple-negative                             | 0.57 (0.27 to 1.22)                         | 0.15    |
| unknown                                     | 1.71 (0.51 to 5.76)                         | 0.39    |
| Single-organ metastases                     |                                             |         |
| yes                                         | 1.24 (0.51 to 2.20)                         | 0.47    |
| no                                          | reference                                   |         |
| Lung metastases                             |                                             |         |
| yes                                         | 3.82 (1.79 to 8.14)                         | 0.001   |
| no                                          | reference                                   |         |
| Bone metastases                             |                                             |         |
| yes                                         | 0.88 (0.52 to 1.51)                         | 0.64    |
| no                                          | reference                                   |         |
| Skin metastases                             |                                             |         |
| yes                                         | 0.14 (0.01 to 1.84)                         | 0.14    |
| no                                          | reference                                   |         |
| First-line systemic therapy                 |                                             |         |
| ET                                          | reference                                   |         |
| taxane-based therapy +/- ET                 | 0.57 (0.29 to 1.12)                         | 0.10    |
| taxane + anthracycline-based therapy +/- ET | 0.48 (0.23 to 1.02)                         | 0.06    |
| anthracycline-based therapy +/- ET          | 1.16 (0.64 to 2.12)                         | 0.62    |
| other therapy +/- ET                        | 0.79 (0.29 to 2.09)                         | 0.63    |
| no systemic therapy                         | 14.28 (3.47 to 58.82)                       | <0.001  |
| Local therapy primary tumor <sup>b</sup>    |                                             |         |
| yes                                         | 0.57 (0.37 to 0.88)                         | 0.01    |
| no                                          | reference                                   |         |
| Local therapy metastases <sup>c</sup>       |                                             |         |
| yes                                         | 0.46 (0.29 to 0.73)                         | 0.001   |
| no                                          | reference                                   |         |

Abbreviations: CI, confidence interval; CNS, central nervous system; ER, estrogen receptor; ET, endocrine therapy; HER2, human epithelial growth factor receptor 2.

<sup>a</sup>95% confidence interval is based on robust standard errors.

<sup>b</sup> Local therapy of the primary tumor was either (surgery n=125, radiotherapy n=30, or a combination n=60). 90% of patients who received local therapy of the primary tumor also received systemic therapy.

<sup>c</sup> Local therapy of metastases was either stereotactic body radiotherapy n=104, metastasectomy n=15, a combination of surgery and stereotactic body radiotherapy n=4 or thermal ablation n=1). All but one patient who received local therapy of metastases also received systemic therapy. In 56 of 126 (44.4%) patients who received local therapy of metastases, the therapy was combined with local therapy of the primary tumor. See Table S1 column 1 and 2 for details.

Figure S1

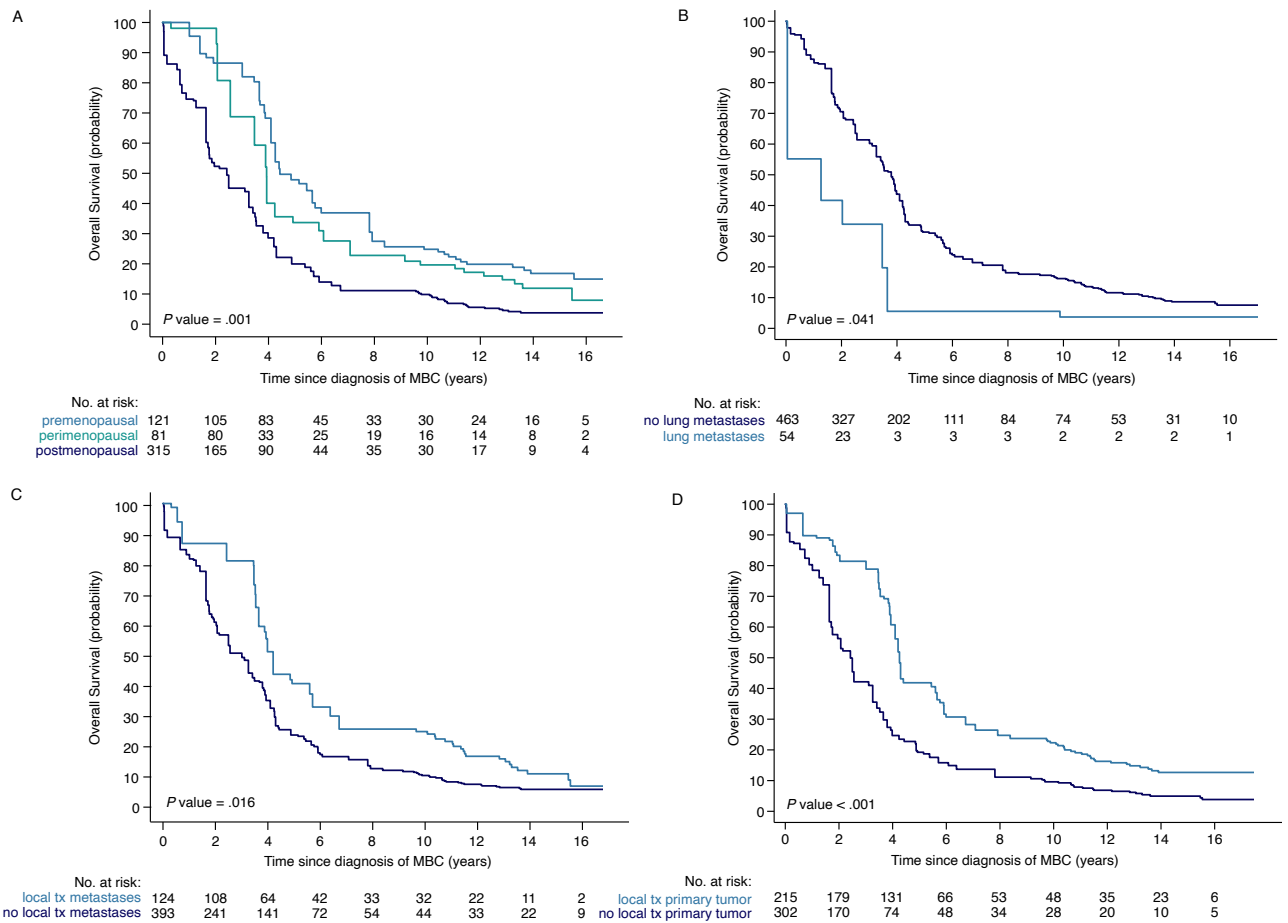

**Supplementary Figure 1. Overall survival in patients with de novo oligometastatic breast cancer ( $\leq 3$  metastases) per subgroup of patients (menopausal status, lung metastases, local therapy of metastases and local therapy of the primary tumor)**

Local therapy of metastases was either stereotactic body radiotherapy, radiofrequency ablation or surgery. Local therapy of the primary tumor was either surgery, radiotherapy or a combination, see Table S1 column 1 and 2 for details. All but one patient who received local therapy of metastases also received systemic therapy. In 56 of 126 (44.4%) patients who received local therapy of metastases, the therapy was combined with local therapy of the primary tumor.
